# Supplementary material
Source: PubMed Central journal article supplement (PMC4070804)
Supplement: PulmCirc-003-654.s001.pdf [file PulmCirc-003-654.s001.pdf]

# Appendix from Wang, et al., “MicroRNA expression profile of pulmonary artery smooth muscle cells and the effect of let-7d in chronic thromboembolic pulmonary hypertension” (PC, vol. 3, no. 3, p. 654)

## Supplemental figure

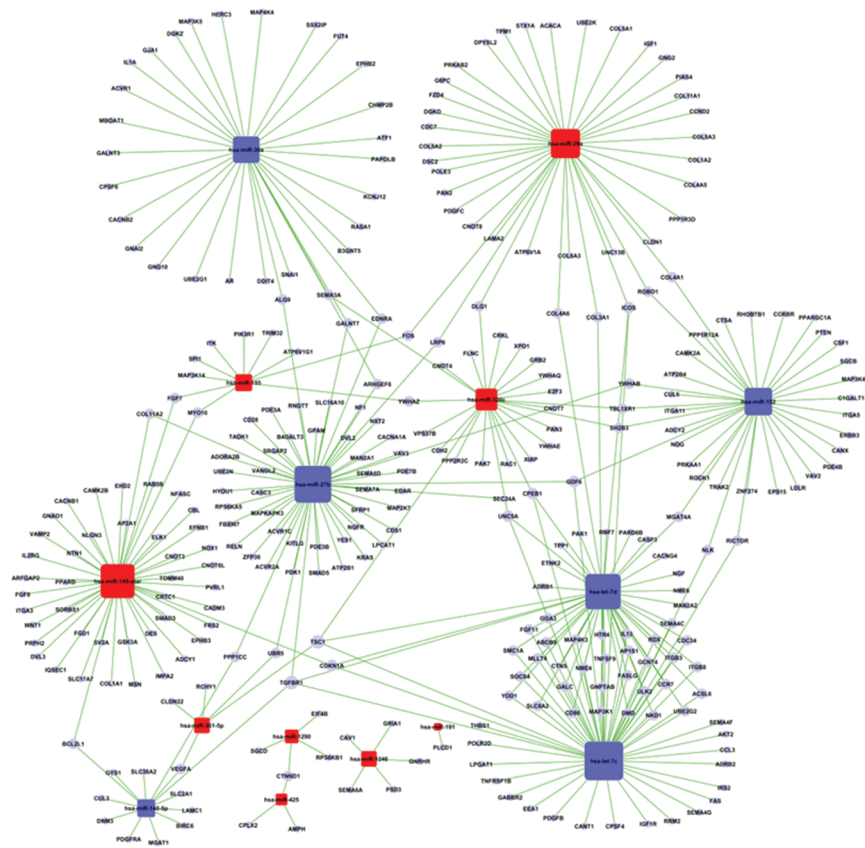

Figure S1. The miRNA-gene-network. The cycle nodes represent messenger RNA (mRNA), the red box nodes represent upregulated microRNA (miRNA), and the blue box nodes represent downregulated miRNA. Edges describe the inhibitive effect of miRNA on mRNA.
